# Supplementary material
Source: PubMed Central journal article supplement (PMC9331143)
Supplement: nn2c04840_si_001.pdf [file nn2c04840_si_001.pdf]

# Smartphone-Based SARS-CoV-2 and Variants Detection System using Colorimetric DNzyme Reaction triggered by Loop-Mediated Isothermal Amplification (LAMP) with Clustered Regularly Interspaced Short Palindromic Repeats (CRISPR)

Jayeon Song,<sup>†,¶</sup> Baekdong Cha,<sup>‡,¶</sup> Jeong Moon,<sup>†,#</sup> Hyowon Jang,<sup>†</sup> Sunjoo Kim,<sup>&,||</sup> Jieun Jang,<sup>||</sup> Dongeun Yong,<sup>§</sup> Hyung-Jun Kwon,<sup>+</sup> In-Chul Lee,<sup>+</sup> Eun-Kyung Lim,<sup>†,\*</sup> Juyeon Jung,<sup>†</sup> Hyun Gyu Park,<sup>#</sup> and Taejoon Kang<sup>†,\*</sup>

<sup>†</sup>Bionanotechnology Research Center, Korea Research Institute of Bioscience and Biotechnology (KRIBB), 125 Gwahak-ro, Yuseong-gu, Daejeon 34141, Republic of Korea

<sup>‡</sup>School of Integrated Technology, Gwangju Institute of Science and Technology (GIST), 123 Cheomdangwagi-ro, Buk-gu, Gwangju 61005, Republic of Korea

<sup>#</sup>Department of Chemical and Biomolecular Engineering, Korea Advanced Institute of Science and Technology (KAIST), 291 Daehak-ro, Yuseong-gu, Daejeon 34141, Republic of Korea

<sup>&</sup>Department of Laboratory Medicine, Gyeongsang National University College of Medicine, 79 Gangnam-ro, Jinju-si, Gyeongsangnam-do 52727, Republic of Korea

<sup>||</sup>Gyeongnam Center for Disease Control and Prevention, 300 Jungang-daero, Uichang-gu, Changwon-si, Gyeongsangnamdo 51154, Republic of Korea

<sup>§</sup>Department of Laboratory Medicine and Research Institute of Bacterial Resistance, Yonsei University College of Medicine, 50-1 Yonsei-ro, Seodaemun-gu, Seoul 03722, Republic of Korea

<sup>+</sup>Functional Biomaterial Research Center, KRIBB, 181 Ipsin-gil, Jeongeup-si, Jeollabuk-do 56212, Republic of Korea

<sup>\*</sup>Department of Nanobiotechnology, KRIBB School of Biotechnology, University of Science and Technology (UST), 217 Gajeong-ro, Yuseong-gu, Daejeon 34113, Republic of Korea

<sup>¶</sup>These authors contributed equally to this work.

Contact Information

Email: kangtaejoon@kribb.re.kr

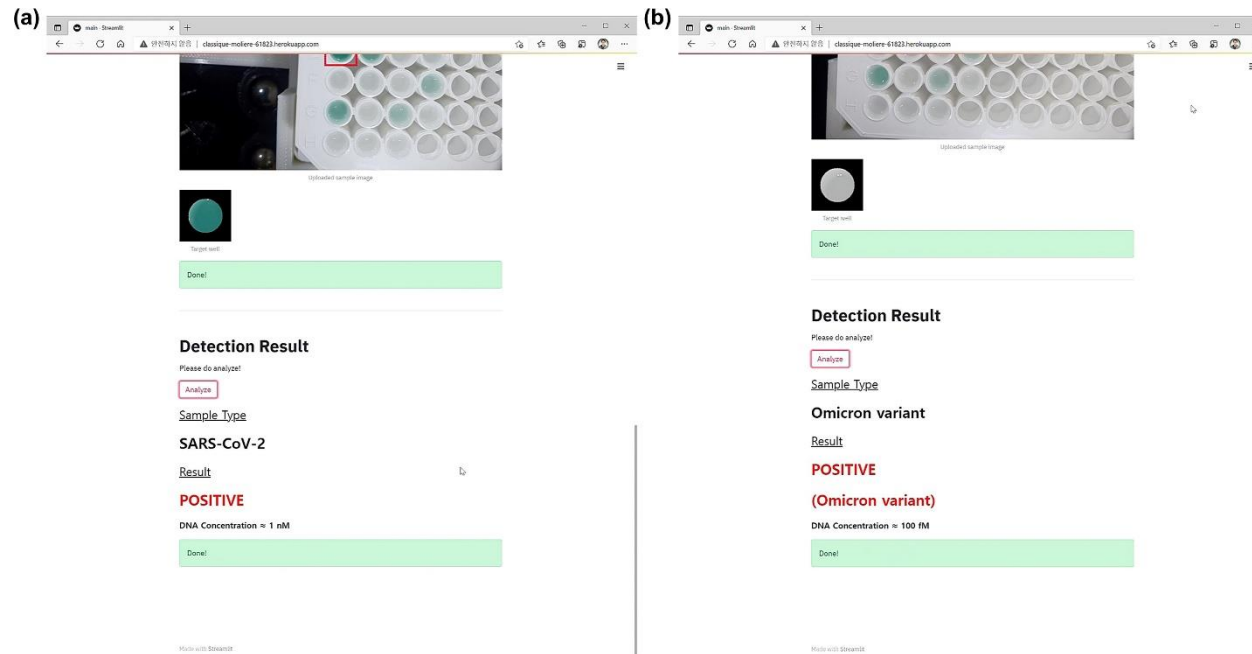

**Movie S1.** (a) Movie of smartphone application for SARS-CoV-2 detection using DAMPR assay system. Diagnostic result considered is positive. (b) Movie of smartphone application for SARS-CoV-2 omicron variant detection using v-DAMPR assay system. Diagnostic result considered is positive.

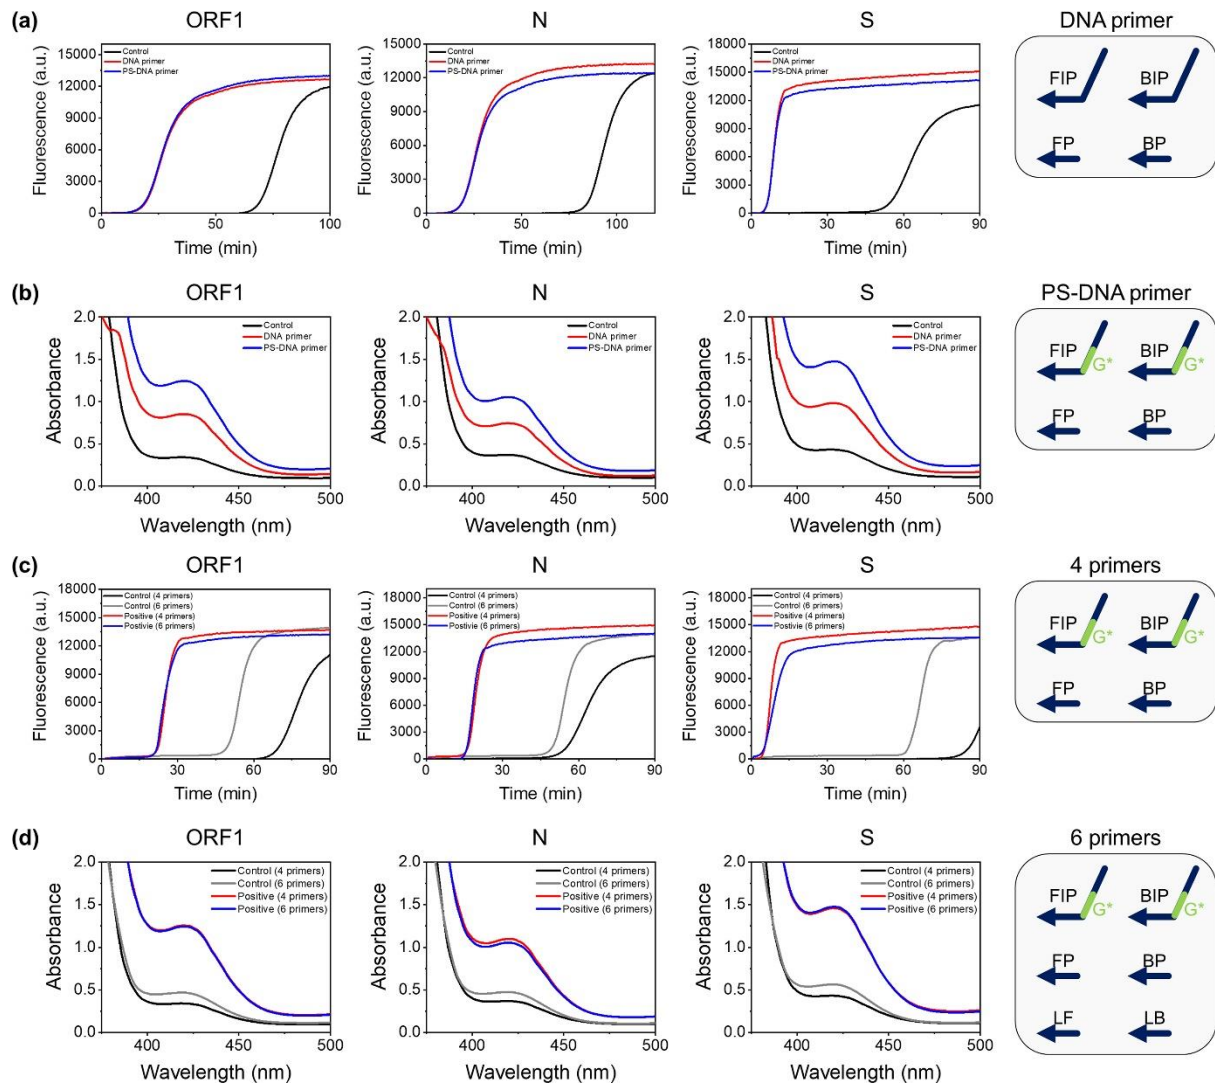

**Figure S1.** (a) Real-time fluorescence curves during detection of SARS-CoV-2 genes and control (no gene, black) using RT-LAMP reactions with DNA (red) and PS-DNA (blue) primers. (b) Absorbance spectra after detection of SARS-CoV-2 genes and control (no gene, black) by RT-LAMP and DNAzyme reactions with DNA (red) and PS-DNA (blue) primers. (c) Real-time fluorescence curves during detection of SARS-CoV-2 genes and control (no gene, black and gray) using RT-LAMP reactions with 4 (red) and 6 (blue) primers. (d) Absorbance spectra after detection of SARS-CoV-2 genes and control (no gene, black and gray) by RT-LAMP and DNAzyme reactions with 4 (red) and 6 (blue) primers.

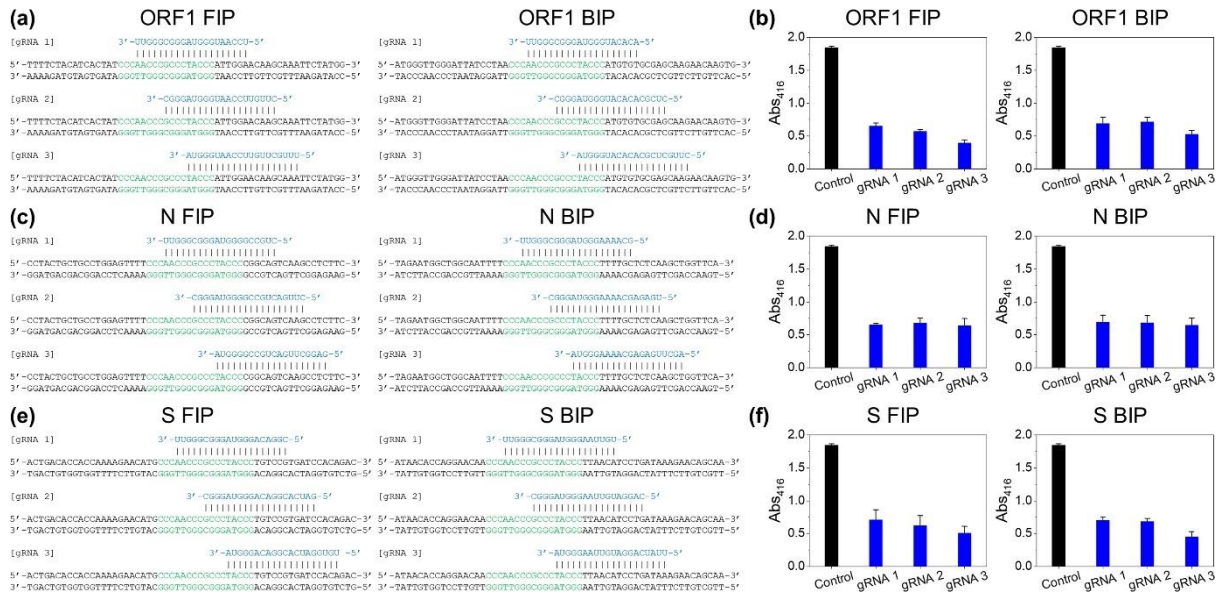

**Figure S2.** (a,c,e) Sequences of gRNAs (blue) for double-checking of (a) ORF1, (c) N, and (e) S gene LAMP products. Greens are DNaseI and complementary sequences in LAMP products. (b,d,f) Plots of Abs<sub>416</sub> as a function of gRNA (n = 3, error bar = standard deviation). Data were obtained after CRISPR reactions with gRNA 1, 2, and 3 (blue), and without gRNA (black) in the presence of LAMP products.

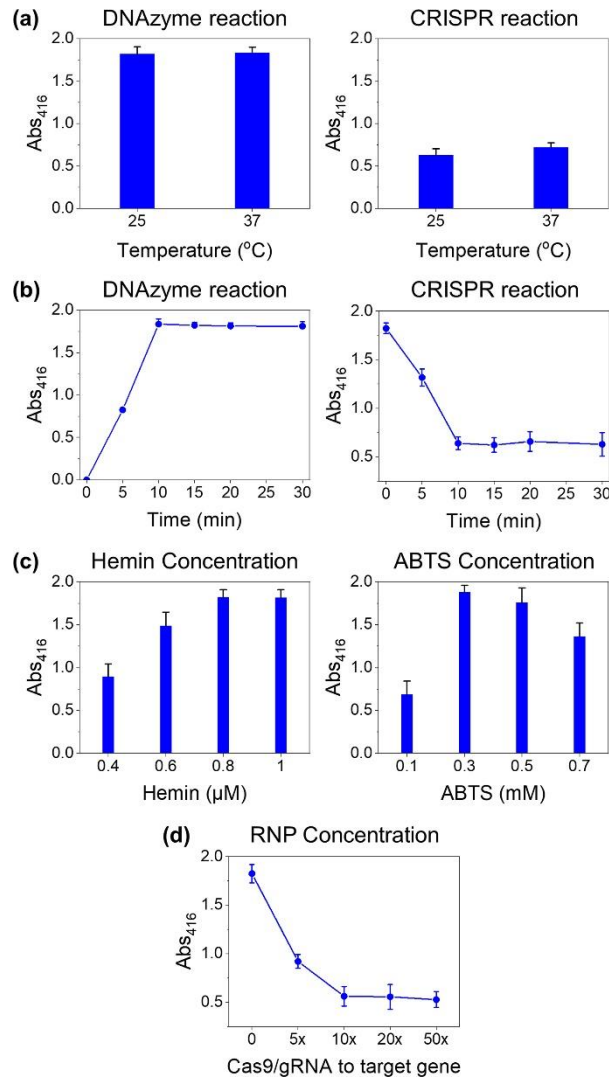

**Figure S3.** (a) Plots of Abs<sub>416</sub> as a function of temperature (n = 3, error bar = standard deviation). Left plot was obtained after detection of SARS-CoV-2 genes by RT-LAMP and DNAzyme reactions at 25 or 37 °C. Right plot was obtained after double-checking of SARS-CoV-2 genes by CRISPR reaction at 25 or 37 °C. (b) Plots of Abs<sub>416</sub> as a function of time (n = 3, error bar = standard deviation). Left plot was obtained after detection of SARS-CoV-2 genes by RT-LAMP and DNAzyme reactions for various times. Right plot was obtained after double-checking of SARS-CoV-2 genes by CRISPR reaction for various times. (c) Plots of Abs<sub>416</sub> as a function of hemin (left) and ABTS (right) concentrations (n = 3, error bar = standard deviation). Plots were obtained after detection of SARS-CoV-2 genes by RT-LAMP and DNAzyme reactions with various concentrations of hemin and ABTS. (d) Plot of Abs<sub>416</sub> as a function of RNP to target gene (n = 3, error bar = standard deviation). Plot was obtained after double-checking of SARS-CoV-2 genes by CRISPR reaction with various concentrations of RNP.

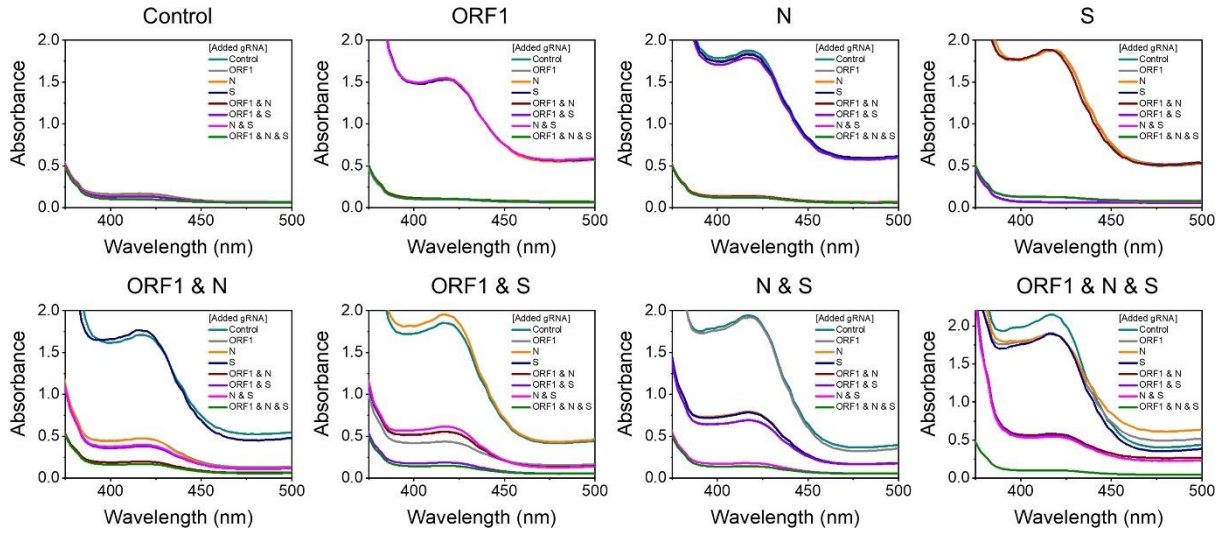

**Figure S4.** Absorbance spectra corresponding to Figure 2b.

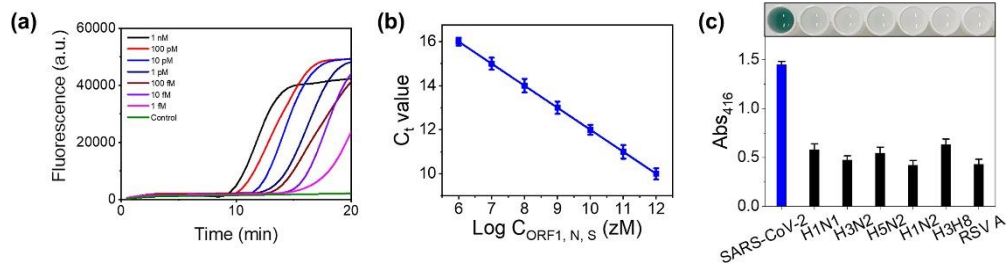

**Figure S5.** (a) Real-time fluorescence curves during detection of SARS-CoV-2 genes (ORF1, N, and S) using RT-LAMP reactions. The concentrations of genes were varied from 1 fM to 1 nM. (b) Plot of  $C_t$  value as a function of logarithmic concentration of SARS-CoV-2 genes (ORF1, N, and S) ( $n = 3$ , error bar = standard deviation). (c) Plot of  $Abs_{416}$  as a function of viral gene (SARS-CoV-2, H1N1, H3N2, H5N2, H1N2, H3H8, and RSV A) ( $n = 3$ , error bar = standard deviation). Plot was obtained after detection of viral genes (1 pM) using RT-LAMP and DNazyme reactions. Photograph is of well plate after RT-LAMP and DNazyme reactions.

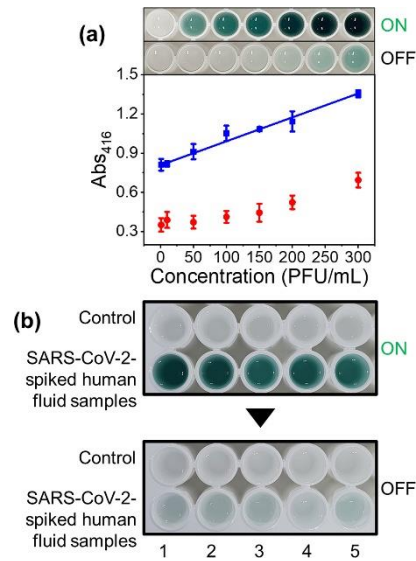

**Figure S6.** (a) Plot of Abs<sub>416</sub> as a function of SARS-CoV-2 lysate concentration (n = 3, error bar = standard deviation). Blue data were obtained after detection of SARS-CoV-2 lysates by RT-LAMP and DNazyme reactions. Red data were obtained after double-checking of SARS-CoV-2 lysates using Cas9/gRNA complexes. Photographs are well plates after RT-LAMP and DNazyme reactions (ON) and CRISPR reaction (OFF). Left wells are control samples. (b) Photograph of well plate after detection of SARS-CoV-2 lysate-spiked human nasopharyngeal aspirates (1, 2, and 3) and sputum (4 and 5) samples (10<sup>2</sup> PFU/mL) by using RT-LAMP and DNazyme reactions (ON). Photograph of the same well plate after double-checking of samples by using CRISPR reaction (OFF).



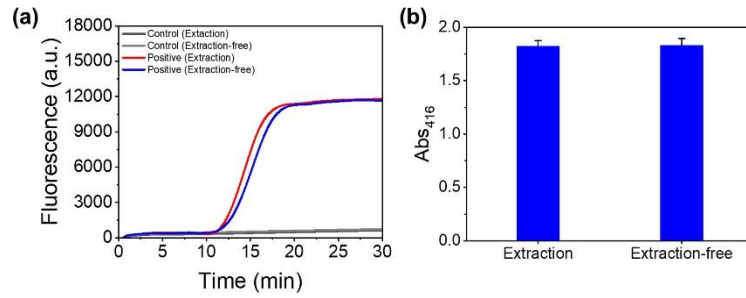

**Figure S7.** (a) Real-time fluorescence curves during detection of SARS-CoV-2 lysates ( $10^4$  PFU/mL) and control (no lysates, black and gray) using RT-LAMP reactions before (blue) and after (red) RNA extraction. (b) Plot of Abs<sub>416</sub> as a function of RNA extraction ( $n = 3$ , error bar = standard deviation). Data were obtained after detection of SARS-CoV-2 lysates ( $10^4$  PFU/mL) by RT-LAMP and DNazyme reactions before and after RNA extraction.

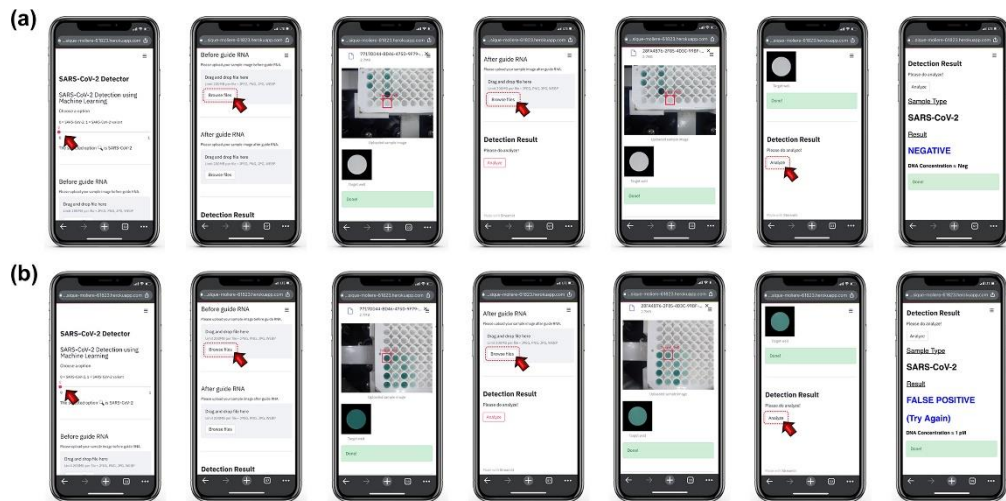

**Figure S8.** (a,b) User manuals of smartphone application for SARS-CoV-2 detection by DAMPR assay system. Exemplified diagnostic result is (a) negative and (b) false-positive.

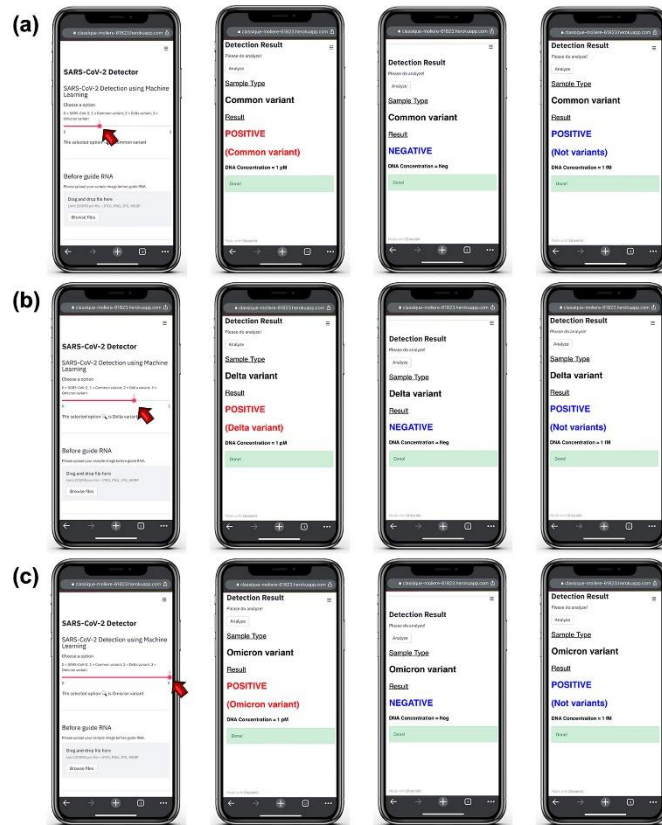

**Figure S9.** (a-c) User manuals of smartphone application for SARS-CoV-2 variants detection by v-DAMPR assay system. Exemplified diagnostic result is (a) variant (D614G), (b) delta-specific variant (T478K), and (c) omicron-specific variant (A67V).

**Figure S10.** Comparison of DAMPR assay with the previous colorimetric SARS-CoV-2 detection methods.

| Method                                                   | Detection                                                                                                          | Performance test                          |                |              |                                                      | Practical applicability test            |                                                                |                   | Reference |             |
|----------------------------------------------------------|--------------------------------------------------------------------------------------------------------------------|-------------------------------------------|----------------|--------------|------------------------------------------------------|-----------------------------------------|----------------------------------------------------------------|-------------------|-----------|-------------|
|                                                          |                                                                                                                    | Sensitivity                               | Quantification | Multiplexing | Reaction time                                        | Image sensing                           | Clinical test                                                  | Variant detection |           | POCT device |
| DAMPR assay                                              | - DNAzyme reaction<br>(Colorimetric detection for naked eye)                                                       | 10, 9, 13 copies for ORF1, N, and S genes | O              | O            | 50 min                                               | Machine-learning based image processing | O<br>206 samples (147 positive and 59 negative)                | O                 | O         | This work   |
| Antibody-conjugated Au NP assay                          | - Au NPs functionalized with antibodies targeting three surface proteins of SARS-CoV-2<br>- Salt control condition | -                                         | X              | X            | Synthesis time (140 min) +<br>Detection time (3 min) | X                                       | O<br>94 samples (45 positive and 49 negative)                  | X                 | X         | [S1]        |
| CRISPR-Cas12a powered visual biosensor                   | - Two types of Au NPs with linker DNA<br>- Centrifuge<br>- Salt control condition                                  | 1 copy                                    | O              | X            | Synthesis time + 90 min                              | RGB analysis                            | O<br>50 samples (20 positive and 30 negative)                  | X                 | O         | [S2]        |
| Conventional PCR assisted single-component assembly      | - Two types of Au NPs with linker DNA<br>- Complex HP design                                                       | 1 copy                                    | X              | X            | Synthesis time + 120 min                             | Naked eye                               | 9 samples (3 positive, 3 low positive, and 3 negative samples) | X                 | X         | [S3]        |
| Antisense Oligonucleotide Capped Plasmonic Nanoparticles | - Au NP synthesis with ASO                                                                                         | 8.3 copies                                | X              | X            | Synthesis time                                       | Naked eye                               | X                                                              | X                 | X         | [S4]        |
| RT-RPA-Coupled CRISPR-Cas12a Colorimetric Assay          | - Au NP synthesis with DNA                                                                                         | 1 copy                                    | X              | X            | Over 13 h                                            | Naked eye                               | X                                                              | X                 | X         | [S5]        |

**Figure S11.** Comparison of DAMPR assay with the previously integrated assays of LAMP and CRISPR-Cas systems.

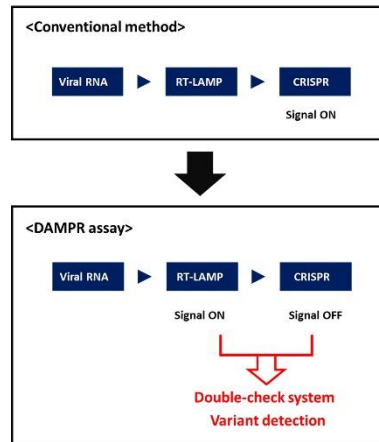

| Method                   | Detection                                                                   | Multiplexing         | CRISPR System           | Double-checking the amplified LAMP products | Clinical test        | Variant detection | Reference |
|--------------------------|-----------------------------------------------------------------------------|----------------------|-------------------------|---------------------------------------------|----------------------|-------------------|-----------|
| DAMPR assay              | DNAzyme reaction (Colorimetric detection for naked eye)                     | O (ORF1, N, S genes) | Cas9 (cis-cleavage)     | O                                           | 206 clinical samples | D614G T478K A67V  | This work |
| RT-LAMP +CRISPR          | Reporter probe (Fluorescence detection)                                     | X (N, E genes)       | Cas12a (trans-cleavage) | X                                           | 100 clinical samples | X                 | [S6]      |
| RT-LAMP +CRISPR          | Reporter probe (Fluorescence detection)                                     | X (ORF1, N, E genes) | Cas12a (trans-cleavage) | X                                           | 10 clinical samples  | X                 | [S7]      |
| RT-LAMP +CRISPR          | Reporter probe (Fluorescence detection+ Blue light detection for naked eye) | X (S gene)           | Cas12a (trans-cleavage) | X                                           | 26 clinical samples  | X                 | [S8]      |
| DETECTR, RT-LAMP +CRISPR | Reporter probe (Fluorescence detection)                                     | X (N, E genes)       | Cas12a (trans-cleavage) | X                                           | 6 clinical samples   | X                 | [S9]      |
| iSCAN                    | LFA                                                                         | X (N, E genes)       | Cas12a (trans-cleavage) | X                                           | 24 clinical samples  | X                 | [S10]     |

**Table S1.** Primer sequences used in this study.

| Target    | Name                 | Sequence (5' → 3') <sup>a</sup>                                                           |
|-----------|----------------------|-------------------------------------------------------------------------------------------|
| ORF1 gene | ORF1 FP              | GCA CCG TAG CTG GTG TCT CTA                                                               |
|           | ORF1 BP              | CAA ATG TTA AAA ACA CTA TTA GCA TA                                                        |
|           | ORF1 LF <sup>b</sup> | ACA GTT TTT AAC ATG TTG                                                                   |
|           | ORF1 LB              | AGC CAT GCC TAA CAT GCT                                                                   |
|           | ORF1 FIP             | AGG TGA GGG TTT TCT ACA TCA CTA TCC CAA CCC<br>GCC CTA CCC ATT GGA ACA AGC AAA TTC TAT GG |
|           | ORF1 BIP             | ATG GGT TGG GAT TAT CCT AAC CCA ACC CGC CCT<br>ACC CAT GTG TGC GAG CAA GAA CAA GTG        |
| N gene    | N FP                 | GCC AAA AGG CTT CTA CGC A                                                                 |
|           | N BP                 | TTT GGC CTT GTT GTT GTT GG                                                                |
|           | N LF                 | GAA TTT CTT GAA CTG TTG                                                                   |
|           | N LB                 | GGC GGT GAT GCT GCT CTT                                                                   |
|           | N FIP                | TCC CCT ACT GCT GCC TGG AGT TTT CCC AAC CCG<br>CCC TAC CCC GGC AGT CAA GCC TCT TC         |
|           | N BIP                | TCC TGC TAG AAT GGC TGG CAA TTT TCC CAA CCC<br>GCC CTA CCC TTT TGC TCT CAA GCT GGT TCA    |
| S gene    | S FP                 | CAT TCA ACT CAG GAC TTG TTC T                                                             |
|           | S BP                 | GCA ACA GGG ACT TCT GTG CA                                                                |
|           | S LF                 | TAA TGT CAA GAA TCT CAA                                                                   |
|           | S LB                 | ATA CTT CTA ACC AGG TTG                                                                   |
|           | S FIP                | ACT GAC ACC ACC AAA AGA ACA TGC CCA ACC CGC<br>CCT ACC CTG TCC GTG ATC CAC AGA C          |
|           | S BIP                | ATA ACA CCA GGA ACA ACC CAA CCC GCC CTA CCC<br>TTA ACA TCC TGA TAA AGA ACA GCA A          |

<sup>a</sup>Green color represents G-quadruplex complementary sequences with PS modification.

<sup>b</sup>LF and LB primers were used for optimization tests.

**Table S2.** gRNA sequences used in this study.

| Target       | Name                  | Sequence (5' → 3')         |
|--------------|-----------------------|----------------------------|
| ORF1 gene    | gRNA FIP 1            | UCC AAU GGG UAG GGC GGG UU |
|              | gRNA FIP 2            | CUU GUU CCA AUG GGU AGG GC |
|              | gRNA FIP 3            | UUU GCU UGU UCC AAU GGG UA |
|              | gRNA BIP 1            | ACA CAU GGG UAG GGC GGG UU |
|              | gRNA BIP 2            | CUC GCA CAC AUG GGU AGG GC |
|              | gRNA BIP 3            | CUU GCU CGC ACA CAU GGG UA |
| N gene       | gRNA FIP 1            | CUG CCG GGG UAG GGC GGG UU |
|              | gRNA FIP 2            | CUU GAC UGC CGG GGU AGG GC |
|              | gRNA FIP 3            | GAG GCU UGA CUG CCG GGG UA |
|              | gRNA BIP 1            | GCA AAA GGG UAG GGC GGG UU |
|              | gRNA BIP 2            | UGA GAG CAA AAG GGU AGG GC |
|              | gRNA BIP 3            | AGC UUG AGA GCA AAA GGG UA |
| S gene       | gRNA FIP 1            | CGG ACA GGG UAG GGC GGG UU |
|              | gRNA FIP 2            | GAU CAC GGA CAG GGU AGG GC |
|              | gRNA FIP 3            | UGU GGA UCA CGG ACA GGG UA |
|              | gRNA BIP 1            | GUU AAG GGA UGU UAA GGG UA |
|              | gRNA BIP 2            | CAG GAU GUU AAG GGU AGG GC |
|              | gRNA BIP 3            | UUA UCA GGA UGU UAA GGG UA |
| S gene D614G | D614G gRNA            | UUA UCA GGG UGU UAA GGG UA |
| S gene T478K | T478K gRNA<br>S' gRNA | CGG UAG CAA ACC UUG GGG UA |
|              |                       | CGG UAG CAC ACC UUG GGG UA |
| S gene A67V  | A67V gRNA<br>S'' gRNA | GUU CCA UGU UAU ACA GGG UA |
|              |                       | GUU CCA UGC UAU ACA GGG UA |

**Table S3.** Comparison of this work with previous reported SARS-CoV-2 assays.

| <b>Method</b> | <b>Target gene</b>            | <b>LOD<br/>(copies/<math>\mu</math>L)</b> | <b>Time<br/>(min)</b> | <b>Ref.</b> |       |
|---------------|-------------------------------|-------------------------------------------|-----------------------|-------------|-------|
| qRT-PCR       | RdRP, E, N                    | 1.25                                      | 60 - 70               | [S11]       |       |
| RT-RCA        | RdRP                          | 2.2                                       | 90                    | [S12]       |       |
| RT-LAMP       | RT-LAMP                       | RdRP, S                                   | 10                    | 60          | [S13] |
|               | opvCRISPR                     | S                                         | 5                     | 45          | [S8]  |
|               | IFAST RT-LAMP                 | ORF1, N                                   | 470                   | 30          | [S14] |
|               | One-tube colorimetric RT-LAMP | RdRP, NSP2                                | 200                   | 60          | [S15] |
|               | RT-Proofman-LAMP              | ORF1ab, N                                 | 100                   | 50          | [S16] |
|               | Cas13a/RT-LAMP                | N1, N2, N3                                | 2.5                   | 60          | [S17] |
|               | SPOT                          | N, E                                      | 0.44, 1.09            | 30          | [S18] |
| NEAR          | RdRP                          | 20                                        | < 20                  | [S19]       |       |
| RT-RPA        | N                             | 7.74                                      | < 30                  | [S20]       |       |
| SHERLOCK      | ORF1ab, S, N                  | 2.1                                       | 90                    | [S21]       |       |
| DETECTR       | E, N                          | 10                                        | 40                    | [S9]        |       |
| DAMPR         | ORF1, N, S                    | 10, 9, 13                                 | 50                    | This work   |       |



**Table S4.** Evaluation of LDA, RF, and GBC classifiers for DAMPR assay system in terms of precision, recall, and f1 score.

| <b>Sample</b>  | <b>Precision<br/>(LDA/RF/GBC)</b> | <b>Recall<br/>(LDA/RF/GBC)</b> | <b>F1 score<br/>(LDA/RF/GBC)</b> | <b>Support<br/>(LDA/RF/GBC)</b> |
|----------------|-----------------------------------|--------------------------------|----------------------------------|---------------------------------|
| Control        | 0.89/1.00/0.95                    | 0.82/0.97/0.92                 | 0.85/0.98/0.93                   | 30/30/30                        |
| 1 aM           | 0.76/0.97/0.90                    | 0.8./0.97/0.90                 | 0.79/0.97/0.90                   | 30/30/30                        |
| 10 aM          | 0.91/0.97/0.97                    | 0.97/1.00/1.00                 | 0.94/0.98/0.98                   | 30/30/30                        |
| 100 aM         | 0.97/1.00/1.00                    | 0.93/1.00/1.00                 | 0.95/1.00/1.00                   | 30/30/30                        |
| 1 fM           | 1.00/1.00/1.00                    | 0.97/1.00/1.00                 | 0.98/1.00/1.00                   | 30/30/30                        |
| 10 fM          | 1.00/1.00/1.00                    | 1.00/1.00/1.00                 | 1.00/1.00/1.00                   | 30/30/30                        |
| 100 fM         | 1.00/1.00/1.00                    | 1.00/1.00/1.00                 | 1.00/1.00/1.00                   | 30/30/30                        |
| 1 pM           | 1.00/1.00/1.00                    | 1.00/1.00/1.00                 | 1.00/1.00/1.00                   | 30/30/30                        |
| 10 pM          | 1.00/1.00/1.00                    | 1.00/1.00/1.00                 | 1.00/1.00/1.00                   | 30/30/30                        |
| 100 pM         | 1.00/1.00/1.00                    | 1.00/1.00/1.00                 | 1.00/1.00/1.00                   | 30/30/30                        |
| 1 nM           | 0.97/1.00/1.00                    | 1.00/1.00/1.00                 | 0.98/1.00/1.00                   | 30/30/30                        |
| 10 nM          | 1.00/1.00/1.00                    | 1.00/1.00/1.00                 | 0.98/1.00/1.00                   | 30/30/30                        |
| <b>Average</b> | <b>0.96/0.99/0.98</b>             | <b>0.96/0.99/0.99</b>          | <b>0.96/0.99/0.98</b>            | <b>360/360/360</b>              |

**Table S5.** Accuracy of LDA, RF, and GBC classifiers for DAMPR assay system.

| <b>LDA (%)</b> | <b>RF (%)</b> | <b>GBC (%)</b> |
|----------------|---------------|----------------|
| 95.84          | 99.38         | 98.75          |

**Table S6.** Diagnostic results of 136 clinical samples by qRT-PCR.

| Number | Sample type      | C <sub>t</sub> value |       |       |
|--------|------------------|----------------------|-------|-------|
|        |                  | ORF1                 | N     | S     |
| 1      | NPS <sup>a</sup> | 11.73                | 13.2  | 12.7  |
| 2      | NPS              | 27.4                 | 28.3  | 30.22 |
| 3      | NPS              | 33.33                | 26.4  | 30.48 |
| 4      | NPS              | 14.2                 | 14.3  | 15.2  |
| 5      | NPS              | 35.08                | 33.81 | 33.6  |
| 6      | NPS              | N/A                  | N/A   | N/A   |
| 7      | NPS              | N/A                  | N/A   | N/A   |
| 8      | NPS              | 29.4                 | 30.2  | 29.95 |
| 9      | NPS              | 8.3                  | 8.9   | 8.7   |
| 10     | NPS              | 11.9                 | 13.1  | 12.8  |
| 11     | NPS              | 12.6                 | 10.81 | 10.94 |
| 12     | NPS              | N/A                  | N/A   | N/A   |
| 13     | NPS              | 22.5                 | 20.6  | 21.31 |
| 14     | NPS              | 28.7                 | 31.1  | 26.3  |
| 15     | NPS              | 7.56                 | 8.3   | 8.5   |
| 16     | NPS              | 22.1                 | 20.09 | 22.3  |
| 17     | NPS              | 24.7                 | 25.2  | 23.2  |
| 18     | NPS              | N/A                  | N/A   | N/A   |
| 19     | NPS              | N/A                  | N/A   | N/A   |
| 20     | NPS              | N/A                  | N/A   | N/A   |
| 21     | NPS              | 21.8                 | 22.4  | 20.9  |
| 22     | NPS              | 26.4                 | 25.7  | 24.3  |
| 23     | NPS              | 38.85                | 37.7  | 37.83 |

| Number | Sample type | C <sub>t</sub> value |       |       |
|--------|-------------|----------------------|-------|-------|
|        |             | ORF1                 | N     | S     |
| 24     | NPS         | N/A                  | N/A   | N/A   |
| 25     | NPS         | N/A                  | N/A   | N/A   |
| 26     | NPS         | N/A                  | N/A   | N/A   |
| 27     | NPS         | N/A                  | N/A   | N/A   |
| 28     | NPS         | 20.4                 | 23.4  | 21.2  |
| 29     | NPS         | N/A                  | N/A   | N/A   |
| 30     | NPS         | N/A                  | N/A   | N/A   |
| 31     | NPS         | N/A                  | N/A   | N/A   |
| 32     | NPS         | 17.3                 | 17.8  | 15.97 |
| 33     | NPS         | N/A                  | N/A   | N/A   |
| 34     | NPS         | N/A                  | N/A   | N/A   |
| 35     | NPS         | N/A                  | N/A   | N/A   |
| 36     | NPS         | 30.17                | 35.8  | 34.1  |
| 37     | NPS         | 22.5                 | 23.1  | 24.3  |
| 38     | NPS         | 31.3                 | 32.1  | 30.2  |
| 39     | NPS         | 24.58                | 28.3  | 25.26 |
| 40     | NPS         | N/A                  | N/A   | N/A   |
| 41     | NPS         | 25.2                 | 23.8  | 24.8  |
| 42     | NPS         | 23.1                 | 22.8  | 21.9  |
| 43     | NPS         | N/A                  | N/A   | N/A   |
| 44     | NPS         | 26.19                | 33.01 | 27.26 |
| 45     | NPS         | N/A                  | N/A   | N/A   |
| 46     | NPS         | 26.47                | 30.1  | 26.5  |
| 47     | NPS         | N/A                  | N/A   | N/A   |

| Number | Sample type | C <sub>t</sub> value |       |       |
|--------|-------------|----------------------|-------|-------|
|        |             | ORF1                 | N     | S     |
| 48     | NPS         | 32.2                 | 31.2  | 27.07 |
| 49     | NPS         | 30.2                 | 29.4  | 28.3  |
| 50     | NPS         | 27.3                 | 22.5  | 29.2  |
| 51     | NPS         | 25.3                 | 28.31 | 27.3  |
| 52     | NPS         | 27.9                 | 28.3  | 21.88 |
| 53     | NPS         | N/A                  | N/A   | N/A   |
| 54     | NPS         | 18.4                 | 18.4  | 15.33 |
| 55     | NPS         | N/A                  | N/A   | N/A   |
| 56     | NPS         | N/A                  | N/A   | N/A   |
| 57     | NPS         | 25.11                | 26.3  | 26.1  |
| 58     | NPS         | 29.95                | 29.16 | 28.73 |
| 59     | NPS         | N/A                  | N/A   | N/A   |
| 60     | NPS         | N/A                  | N/A   | N/A   |
| 61     | NPS         | N/A                  | N/A   | N/A   |
| 62     | NPS         | 26.3                 | 25.4  | 25.2  |
| 63     | NPS         | N/A                  | N/A   | N/A   |
| 64     | NPS         | N/A                  | N/A   | N/A   |
| 65     | NPS         | 12.52                | 13.84 | 11.63 |
| 66     | NPS         | N/A                  | N/A   | N/A   |
| 67     | NPS         | 25.3                 | 28.31 | 24.3  |
| 68     | NPS         | N/A                  | N/A   | N/A   |
| 69     | NPS         | 25.26                | 25.34 | 26.53 |
| 70     | NPS         | 24.85                | 26.16 | 24.35 |
| 71     | NPS         | 25.1                 | 23.6  | 26.3  |

| Number | Sample type | C <sub>t</sub> value |       |       |
|--------|-------------|----------------------|-------|-------|
|        |             | ORF1                 | N     | S     |
| 72     | NPS         | 17.3                 | 17.5  | 16.1  |
| 73     | NPS         | 25.1                 | 28.9  | 25.3  |
| 74     | NPS         | N/A                  | N/A   | N/A   |
| 75     | NPS         | 10.57                | 11.3  | 11.73 |
| 76     | NPS         | 25.2                 | 29.1  | 24.3  |
| 77     | NPS         | N/A                  | N/A   | N/A   |
| 78     | NPS         | N/A                  | N/A   | N/A   |
| 79     | NPS         | N/A                  | N/A   | N/A   |
| 80     | NPS         | N/A                  | N/A   | N/A   |
| 81     | NPS         | 11.13                | 14.2  | 12.88 |
| 82     | NPS         | N/A                  | N/A   | N/A   |
| 83     | NPS         | N/A                  | N/A   | N/A   |
| 84     | NPS         | 28.73                | 33.1  | 29.27 |
| 85     | NPS         | 33.2                 | 34.2  | 31.1  |
| 86     | NPS         | N/A                  | N/A   | N/A   |
| 87     | NPS         | N/A                  | N/A   | N/A   |
| 88     | NPS         | N/A                  | N/A   | N/A   |
| 89     | NPS         | 24.88                | 28.1  | 23.07 |
| 90     | NPS         | N/A                  | N/A   | N/A   |
| 91     | NPS         | N/A                  | N/A   | N/A   |
| 92     | NPS         | 22.7                 | 21.3  | 21.8  |
| 93     | NPS         | N/A                  | N/A   | N/A   |
| 94     | NPS         | 33.2                 | 30.22 | 28.84 |
| 95     | NPS         | N/A                  | N/A   | N/A   |

| Number | Sample type | C <sub>t</sub> value |       |       |
|--------|-------------|----------------------|-------|-------|
|        |             | ORF1                 | N     | S     |
| 96     | NPS         | N/A                  | N/A   | N/A   |
| 97     | NPS         | 11.56                | 13.8  | 11.9  |
| 98     | NPS         | 32.7                 | 30.1  | 33.1  |
| 99     | NPS         | 22.1                 | 21.2  | 25.3  |
| 100    | NPS         | 31.43                | 32.1  | 32.7  |
| 101    | NPS         | N/A                  | N/A   | N/A   |
| 102    | NPS         | N/A                  | N/A   | N/A   |
| 103    | NPS         | N/A                  | N/A   | N/A   |
| 104    | NPS         | 26.8                 | 26.9  | 27.56 |
| 105    | NPS         | 11.69                | 12.5  | 12.27 |
| 106    | NPS         | N/A                  | N/A   | N/A   |
| 107    | NPS         | N/A                  | N/A   | N/A   |
| 108    | NPS         | 33.7                 | 34.5  | 33.8  |
| 109    | NPS         | N/A                  | N/A   | N/A   |
| 110    | NPS         | 10.14                | 11.3  | 11.57 |
| 111    | NPS         | N/A                  | N/A   | N/A   |
| 112    | NPS         | 13.35                | 19.05 | 13.69 |
| 113    | NPS         | 26.8                 | 25.4  | 26.2  |
| 114    | NPS         | 25.2                 | 28.3  | 25.1  |
| 115    | NPS         | 29.19                | 28.12 | 29.06 |
| 116    | NPS         | N/A                  | N/A   | N/A   |
| 117    | NPS         | N/A                  | N/A   | N/A   |
| 118    | NPS         | N/A                  | N/A   | N/A   |
| 119    | NPS         | 32.7                 | 33.4  | 31.3  |

| Number | Sample type | C <sub>t</sub> value |       |       |
|--------|-------------|----------------------|-------|-------|
|        |             | ORF1                 | N     | S     |
| 120    | NPS         | N/A                  | N/A   | N/A   |
| 121    | NPS         | 10.59                | 13.1  | 12.4  |
| 122    | NPS         | N/A                  | N/A   | N/A   |
| 123    | NPS         | N/A                  | N/A   | N/A   |
| 124    | NPS         | N/A                  | N/A   | N/A   |
| 125    | NPS         | 9.37                 | 11.3  | 10.1  |
| 126    | NPS         | 27.15                | 28.31 | 29.95 |
| 127    | Sputum      | 13.8                 | 14.5  | 8.7   |
| 128    | Sputum      | 33.51                | 32.92 | 12.8  |
| 129    | Sputum      | 20.3                 | 21.7  | 20.1  |
| 130    | Sputum      | 33.25                | 34.1  | 33.2  |
| 131    | Sputum      | 14.3                 | 13.8  | 13.5  |
| 132    | Sputum      | 19.8                 | 18.1  | 20.6  |
| 133    | Sputum      | 31.9                 | 32.8  | 24.8  |
| 134    | Sputum      | 32.7                 | 32.58 | 32.4  |
| 135    | Sputum      | 33.11                | 33.45 | 15.65 |
| 136    | Sputum      | 17.3                 | 19.2  | 20.1  |

<sup>a</sup>Nasopharyngeal swab

<sup>b</sup>Not available



**Table S7.** Diagnostic results of 80 clinical samples by qRT-PCR.

| Number | Variant | Sample type      | C <sub>t</sub> value |       |
|--------|---------|------------------|----------------------|-------|
|        |         |                  | RdRP                 | E     |
| 1      | Delta   | NPS              | 9.81                 | 10.64 |
| 2      | Delta   | NPS              | 13.81                | 13.98 |
| 3      | Delta   | NPS              | 13.38                | 13.41 |
| 4      | Delta   | NPS              | 13.65                | 13.92 |
| 5      | Delta   | NPS              | 12.89                | 12.88 |
| 6      | Delta   | NPS              | 12.32                | 12.53 |
| 7      | Delta   | NPS              | 13.83                | 13.65 |
| 8      | Delta   | NPS              | 10.28                | 10.53 |
| 9      | Delta   | NPS              | 10.35                | 10.54 |
| 10     | Delta   | NPS              | 10.42                | 10.13 |
| 11     | WT      | NPS              | 9.37                 | 11.37 |
| 12     | WT      | NPS              | 10.14                | 11.57 |
| 13     | WT      | NPS              | 10.57                | 11.73 |
| 14     | WT      | NPS              | 10.59                | 12.03 |
| 15     | WT      | NPS              | 11.13                | 12.88 |
| 16     | WT      | NPS              | 11.56                | 11.90 |
| 17     | WT      | NPS              | 11.69                | 12.27 |
| 18     | WT      | NPS              | 12.40                | 12.19 |
| 19     | WT      | NPS              | 12.52                | 11.63 |
| 20     | WT      | NPS              | 13.35                | 13.69 |
| 21     | Delta   | NPS <sup>a</sup> | 24.28                | 22.19 |
| 22     | Delta   | NPS              | 18.11                | 15.34 |
| 23     | Delta   | NPS              | 17.48                | 18.23 |

| Number | Variant | Sample type | C <sub>t</sub> value |       |
|--------|---------|-------------|----------------------|-------|
|        |         |             | RdRP                 | E     |
| 24     | Delta   | NPS         | 16.17                | 15.50 |
| 25     | Delta   | NPS         | 18.26                | 19.25 |
| 26     | Delta   | NPS         | 16.85                | 17.54 |
| 27     | Delta   | NPS         | 18.21                | 16.67 |
| 28     | Delta   | NPS         | 21.06                | 21.23 |
| 29     | Delta   | NPS         | 13.72                | 15.13 |
| 30     | Delta   | NPS         | 15.43                | 15.41 |
| 31     | Delta   | NPS         | 13.86                | 14.42 |
| 32     | Delta   | NPS         | 15.62                | 16.37 |
| 33     | Delta   | NPS         | 27.48                | 24.73 |
| 34     | Delta   | NPS         | 15.06                | 15.17 |
| 35     | Delta   | NPS         | 19.65                | 16.41 |
| 36     | Delta   | NPS         | 25.24                | 25.27 |
| 37     | Delta   | NPS         | 19.21                | 19.56 |
| 38     | Delta   | NPS         | 23.79                | 20.82 |
| 39     | Delta   | NPS         | 22.02                | 20.11 |
| 40     | Delta   | NPS         | 18.37                | 16.37 |
| 41     | Delta   | NPS         | 16.83                | 18.02 |
| 42     | Delta   | NPS         | 28.82                | 30.81 |
| 43     | Delta   | NPS         | 20.04                | 21.40 |
| 44     | Delta   | NPS         | 21.29                | 20.14 |
| 45     | Delta   | NPS         | 19.15                | 19.00 |
| 46     | Delta   | NPS         | 14.25                | 15.10 |
| 47     | Delta   | NPS         | 13.73                | 14.02 |

| Number | Variant | Sample type | C <sub>t</sub> value |       |
|--------|---------|-------------|----------------------|-------|
|        |         |             | RdRP                 | E     |
| 48     | Delta   | NPS         | 16.80                | 16.39 |
| 49     | Delta   | NPS         | 11.59                | 11.89 |
| 50     | Delta   | NPS         | 25.20                | 26.27 |
| 51     | Delta   | NPS         | 14.09                | 13.58 |
| 52     | Delta   | NPS         | 18.56                | 18.80 |
| 53     | Delta   | NPS         | 17.74                | 17.48 |
| 54     | Delta   | NPS         | 22.14                | 21.08 |
| 55     | Delta   | NPS         | 30.75                | 29.74 |
| 56     | Delta   | NPS         | 31.73                | 32.31 |
| 57     | Delta   | NPS         | 17.02                | 16.25 |
| 58     | Delta   | NPS         | 16.27                | 16.30 |
| 59     | Delta   | NPS         | 22.67                | 23.32 |
| 60     | Delta   | NPS         | 30.15                | 26.68 |
| 61     | Delta   | NPS         | 28.11                | 29.87 |
| 62     | Delta   | NPS         | 17.45                | 18.31 |
| 63     | Delta   | NPS         | 13.32                | 16.47 |
| 64     | Delta   | NPS         | 18.55                | 20.15 |
| 65     | Delta   | NPS         | 20.10                | 16.98 |
| 66     | Delta   | NPS         | 30.72                | 32.54 |
| 67     | Delta   | NPS         | 25.73                | 23.69 |
| 68     | Delta   | NPS         | 15.13                | 13.89 |
| 69     | Delta   | NPS         | 29.36                | 28.64 |
| 70     | Delta   | NPS         | 18.36                | 16.58 |
| 71     | Omicron | NPS         | 22.08                | 20.77 |

| Number | Variant | Sample type | C <sub>t</sub> value |       |
|--------|---------|-------------|----------------------|-------|
|        |         |             | RdRP                 | E     |
| 72     | Omicron | NPS         | 16.77                | 16.95 |
| 73     | Omicron | NPS         | 14.81                | 14.68 |
| 74     | Omicron | NPS         | 16.89                | 15.21 |
| 75     | Omicron | NPS         | 29.34                | 29.24 |
| 76     | Omicron | NPS         | 14.85                | 15.37 |
| 77     | Omicron | NPS         | 15.24                | 15.96 |
| 78     | Omicron | NPS         | 23.45                | 21.7  |
| 79     | Omicron | NPS         | 17.3                 | 18.16 |
| 80     | Omicron | NPS         | 23.98                | 24.67 |

## References

- [S1] Ventura, B. della; Cennamo, M.; Minopoli, A.; Campanile, R.; Censi, S. B.; Terracciano, D.; Portella, G.; Velotta, R. Colorimetric Test for Fast Detection of SARS-CoV-2 in Nasal and Throat Swabs. *ACS Sens.* **2020**, *5*, 3043-3048.
- [S2] Ma, L.; Yin, L.; Li, X.; Chen, S.; Peng, L.; Liu, G.; Ye, S.; Zhang, W.; Man, S. A Smartphone-Based Visual Biosensor for CRISPR-Cas Powered SARS-CoV-2 Diagnostics. *Biosens. Bioelectron.* **2022**, *195*, 113646.
- [S3] Karami, A.; Hasani, M.; Azizi Jalilian, F.; Ezati, R. Conventional PCR Assisted Single-Component Assembly of Spherical Nucleic Acids for Simple Colorimetric Detection of SARS-CoV-2. *Sens. Actuat. B* **2021**, *328* 128971.
- [S4] Moitra, P.; Alafeef, M.; Dighe, K.; Frieman, M. B.; Pan, D. Selective Naked-Eye Detection of SARS-CoV-2 Mediated by N Gene Targeted Antisense Oligonucleotide Capped Plasmonic Nanoparticles. *ACS Nano* **2020**, *14*, 7617-7627.
- [S5] Zhang, W. S.; Pan, J.; Li, F.; Zhu, M.; Xu, M.; Zhu, H.; Yu, Y.; Su, G. Reverse Transcription Recombinase Polymerase Amplification Coupled with CRISPR-Cas12a for Facile and Highly Sensitive Colorimetric SARS-CoV-2 Detection. *Anal. Chem.* **2021**, *93*, 4126-4133.
- [S6] Pang, B.; Xu, J.; Liu, Y.; Peng, H.; Feng, W.; Cao, Y.; Wu, J.; Xiao, H.; Pabbaraju, K.; Tipples, G.; Joyce, M. A.; Saffran, H. A.; Tyrrell, D. L.; Zhang, H.; Le, X. C. Isothermal Amplification and Ambient Visualization in a Single Tube for the Detection of SARS-CoV-2 Using Loop-Mediated Amplification and CRISPR Technology. *Anal. Chem.* **2020**, *92*, 16204-16212.
- [S7] Chen, Y.; Shi, Y.; Chen, Y.; Yang, Z.; Wu, H.; Zhou, Z.; Li, J.; Ping, J.; He, L.; Shen, H.; Chen, Z.; Wu, J.; Yu, Y.; Zhang, Y.; Chen, H. Contamination-Free Visual Detection of SARS-CoV-2 with CRISPR/Cas12a: A Promising Method in the Point-of-Care Detection. *Biosens. Bioelectron.* **2020**, *169*, 112642.
- [S8] Wang, R.; Qian, C.; Pang, Y.; Li, M.; Yang, Y.; Ma, H.; Zhao, M.; Qian, F.; Yu, H.; Liu, Z.; Ni, T.; Zheng, Y.; Wang, Y. OpvCRISPR: One-Pot Visual RT-LAMP-CRISPR Platform for SARS-Cov-2 Detection. *Biosens. Bioelectron.* **2021**, *172*, 112766.
- [S9] Broughton, J. P.; Deng, X.; Yu, G.; Fasching, C. L.; Servellita, V.; Singh, J.; Miao, X.; Streithorst, J. A.; Granados, A.; Sotomayor-Gonzalez, A.; Zorn, K.; Gopez, A.; Hsu, E.; Gu, W.; Miller, S.; Pan, C.-Y.; Guevara, H.; Wadford, D. A.; Chen, J. S.; Chiu, C. Y. CRISPR-Cas12-Based Detection of SARS-CoV-2. *Nat. Biotechnol.* **2020**, *38*, 870-874.

- [S10] Ali, Z.; Aman, R.; Mahas, A.; Rao, G. S.; Tehseen, M.; Marsic, T.; Salunke, R.; Subudhi, A. K.; Hala, S. M.; Hamdan, S. M.; Pain, A.; Alofi, F. S.; Alsomali, A.; Hashem, A. M.; Khogeer, A.; Almontashiri, N. A. M.; Abedalthagafi, M.; Hassan, N.; Mahfouz, M. M. ISCAN: An RT-LAMP-Coupled CRISPR-Cas12 Module for Rapid, Sensitive Detection of SARS-CoV-2. *Virus Research* **2020**, 288, 198129.
- [S11] Farfour, E.; Lesprit, P.; Visseaux, B.; Pascreau, T.; Jolly, E.; Houhou, N.; Mazaux, L.; Asso-Bonnet, M.; Vasse, M. The Allplex 2019-NCoV (Seegene) Assay: Which Performances Are for SARS-CoV-2 Infection Diagnosis? *Eur. J. Clin. Microbiol. Infect. Dis.* **2020**, 39, 1997-2000.
- [S12] Tian, B.; Gao, F.; Fock, J.; Dufva, M.; Hansen, M. F. Homogeneous Circle-to-Circle Amplification for Real-Time Optomagnetic Detection of SARS-CoV-2 RdRp Coding Sequence. *Biosens. Bioelectron.* **2020**, 165, 112356.
- [S13] Yan, C.; Cui, J.; Huang, L.; Du, B.; Chen, L.; Xue, G.; Li, S.; Zhang, W.; Zhao, L.; Sun, Y.; Yao, H.; Li, N.; Zhao, H.; Feng, Y.; Liu, S.; Zhang, Q.; Liu, D.; Yuan, J. Rapid and Visual Detection of 2019 Novel Coronavirus (SARS-CoV-2) by a Reverse Transcription Loop-Mediated Isothermal Amplification Assay. *Clin. Microbiol. Infect.* **2020**, 26, 773-779.
- [S14] Rodriguez-Mateos, P.; Ngamsom, B.; Walter, C.; Dyer, C. E.; Gitaka, J.; Iles, A.; Pamme, N. A Lab-on-a-Chip Platform for Integrated Extraction and Detection of SARS-CoV-2 RNA in Resource-Limited Settings. *Anal. Chim. Acta.* **2021**, 1177, 338758.
- [S15] He, Y.; Xie, T.; Tong, Y. Rapid and Highly Sensitive One-Tube Colorimetric RT-LAMP Assay for Visual Detection of SARS-CoV-2 RNA. *Biosens. Bioelectron.* **2021**, 187, 113300.
- [S16] Ding, S.; Chen, G.; Wei, Y.; Dong, J.; Du, F.; Cui, X.; Huang, X.; Tang, Z. Sequence-Specific and Multiplex Detection of COVID-19 Virus (SARS-CoV-2) Using Proofreading Enzyme-Mediated Probe Cleavage Coupled with Isothermal Amplification. *Biosens. Bioelectron.* **2021**, 178, 113041.
- [S17] Crone, M. A.; Priestman, M.; Ciecionska, M.; Jensen, K.; Sharp, D. J.; Anand, A.; Randell, P.; Storch, M.; Freemont, P. S. A Role for Biofoundries in Rapid Development and Validation of Automated SARS-CoV-2 Clinical Diagnostics. *Nat. Commun.* **2020**, 11, 1-11.
- [S18] Xun, G.; Lane, S. T.; Petrov, V. A.; Pepa, B. E.; Zhao, H. A Rapid, Accurate, Scalable, and Portable Testing System for COVID-19 Diagnosis. *Nat. Commun.* **2021**, 12, 1-9.
- [S19] Zhen, W.; Smith, E.; Manji, R.; Schron, D.; Berry, G. J. Clinical Evaluation of Three Sample-to-Answer Platforms for Detection of SARS-CoV-2. *J. Clin. Microbiol.* **2020**, 58, e00783-20.

[S20] Behrmann, O.; Bachmann, I.; Spiegel, M.; Schramm, M.; Abd El Wahed, A.; Dobler, G.; Dame, G.; Hufert, F. T. Rapid Detection of SARS-CoV-2 by Low Volume Real-Time Single Tube Reverse Transcription Recombinase Polymerase Amplification Using an Exo Probe with an Internally Linked Quencher (Exo-IQ). *Clin. Chem.* **2020**, 66, 1047-1054.

[S21] Patchsung, M.; Jantarug, K.; Pattama, A.; Aphicho, K.; Suraritdechachai, S.; Meesawat, P.; Sappakhaw, K.; Leelahakorn, N.; Ruenkam, T.; Wongsatit, T.; Athipanyasilp, N.; Eiamthong, B.; Lakkanasirorat, B.; Phoodokmai, T.; Niljianskul, N.; Pakotiprapha, D.; Chanarat, S.; Homchan, A.; Tinikul, R.; Kamutira, P. et al. Uttamapinant, C. Clinical Validation of a Cas13-Based Assay for the Detection of SARS-CoV-2 RNA. *Nat. Biomed. Eng.* **2020**, 4, 1140-1149.
